# Supplementary material for: Balancing Functional Tradeoffs between Protein Stability and ACE2 Binding in the SARS-CoV-2 Omicron BA.2, BA.2.75 and XBB Lineages: Dynamics-Based Network Models Reveal Epistatic Effects Modulating Compensatory Dynamic and Energetic Changes
Source: MDPI journal article supplement (doi:10.3390/v15051143), 2023-05-10
Supplement: s1 [file s1]

# Supplementary Materials

## **Balancing Functional Tradeoffs between Protein Stability and ACE2 Binding in the SARS-CoV-2 Omicron BA.2, BA.2.75 and XBB Lineages: Dynamics-Based Network Models Reveal Epistatic Effects Modulating Compensatory Dynamic and Energetic Changes**

**Gennady Verkhivker <sup>1,2,\*</sup>, Mohammed Alshahrani <sup>1</sup> and Grace Gupta <sup>1</sup>**

<sup>1</sup> Keck Center for Science and Engineering, Graduate Program in Computational and Data Sciences, Schmid College of Science and Technology, Chapman University, Orange, CA 92866, USA;

alshahrani@chapman.edu (M.A.); grgupta@chapman.edu (G.G.)

<sup>2</sup> Department of Biomedical and Pharmaceutical Sciences, Chapman University School of Pharmacy, Irvine, CA 92618, USA

\* Correspondence: verkhivk@chapman.edu; Tel.: +1-714-516-4586

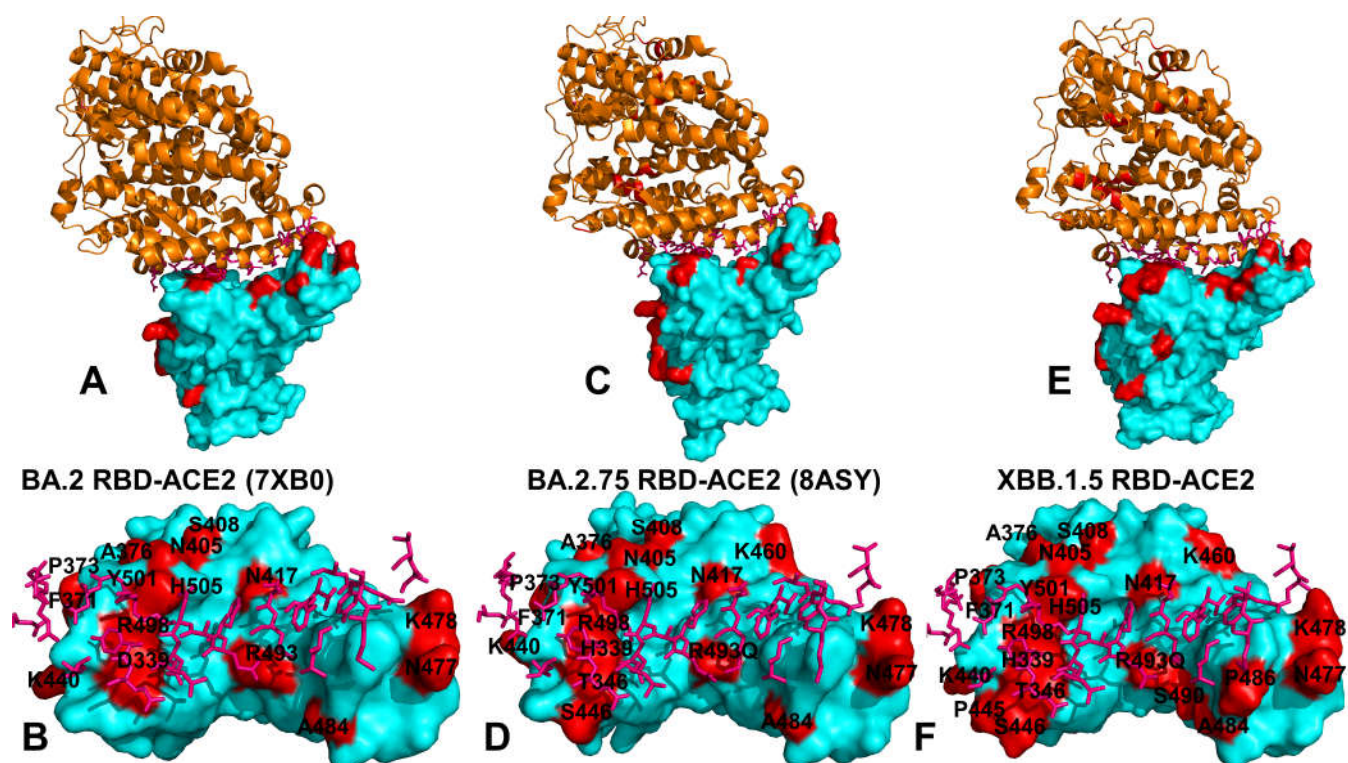

**Figure S1.** Structural organization of the SARS-CoV-2-RBD Omicron BA.2, BA.2.75, XBB.1 and XBB.1.5 complexes with human ACE2 enzyme. (A) The crystal structure of the Omicron RBD BA.2-ACE2 complex (pdb id 7XB0). The RBD is shown in cyan-colored surface and the bound ACE2 enzyme is in orange ribbons. (B) The RBD-BA.2 is shown in cyan surface from the top view. The ACE2 binding residues are shown in pink sticks. The Omicron RBD BA.2 sites (G339D, S371F, S373P, S375F, T376A, D405N, R408S, K417N, N440K, S477N, T478K, E484A, Q493R, Q498R, N501Y, Y505H) are shown in red surface and annotated. (C) The crystal structure of the Omicron RBD BA.2.75-ACE2 complex (pdb id 8ASY). The RBD is shown in cyan-colored surface and the bound ACE2 enzyme is in orange ribbons. (D) The RBD-BA.2.75 is shown from the top view. The ACE2 binding residues are shown in pink sticks. The Omicron RBD BA.2.75 sites (G339H, S371F, S373P, S375F, T376A, D405N, R408S, K417N, N440K, G446N, N460K, S477N, T478K, E484A, R493Q, Q498R, N501Y, Y505H) are shown in red surface and annotated. (E) The refined structural model of the Omicron RBD XBB.1.5-ACE2 complex. The RBD is shown in cyan-colored surface and the bound ACE2 enzyme is in orange ribbons. (F) The RBD-XBB.1 is shown from the top view and the ACE2 binding residues are shown in pink-colored sticks. The Omicron RBD XBB.1.5 sites (G339H, R346T, L368I, S371F, S373P, S375F, T376A, D405N, R408S, K417N, N440K, V445P, G446S, N460K, S477N, T478K, E484A, F486P, F490S, R493Q, Q498R, N501Y, Y505H) are shown in red-colored surface and annotated.

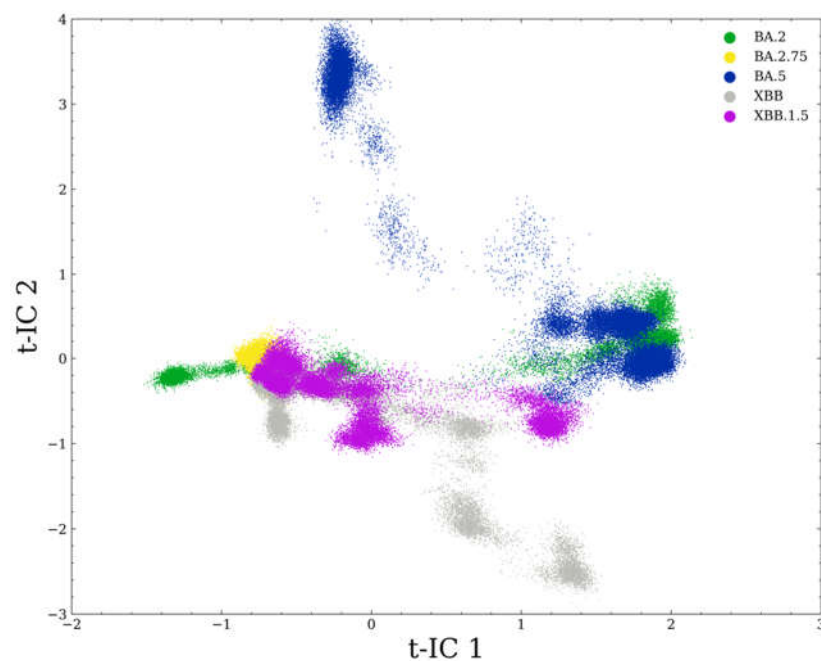

**Figure S2.** The low-dimensional representation with 2 components (t-IC) obtained from MD simulations of the Omicron RBD-ACE2 complexes. Note that the distribution of BA.2.75 simulation is limited to the yellow area. Other complexes explore much wider areas. To visualize the distribution density of all simulations a hexagon binning is applied. Each hexagon represents a small region, and the color bar shows the frequency of this region.

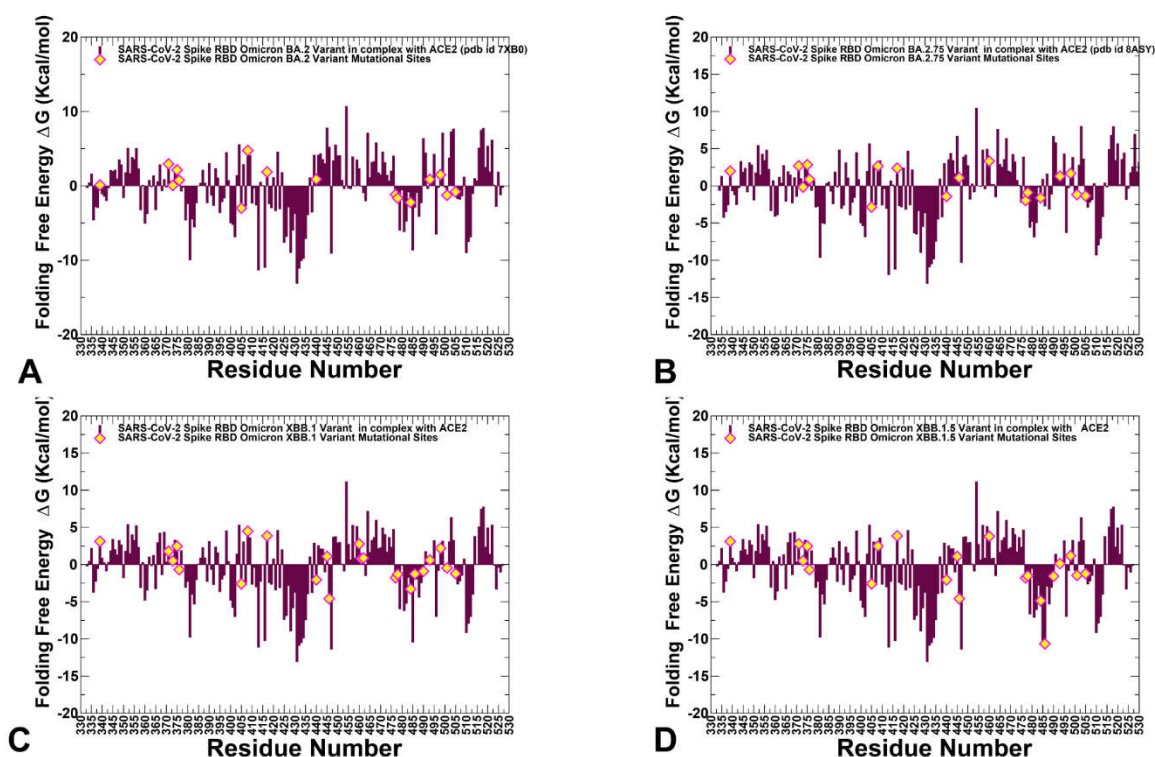

**Figure S3.** The folding free energies of the RBD residues for the SARS-CoV-2 S Omicron RBD-hACE2 complexes for BA.2, BA.2.75, XBB.1 and XBB.1.5 variants. The folding free energies for the RBD residues in the BA.2 RBD-hACE2 complex (A), BA.2.75 RBD-hACE2 complex (B), XBB.1 RBD-hACE2 complex (C) and XBB.1.5 RBD-hACE2 complex (D). The profiles are shown in maroon-colored bars. The positions of the Omicron mutational sites on the profiles are highlighted in yellow-colored filled diamonds. Note that the XBB.1.5 mutational sites V445P, G446S, N460K, S477N, T478K, E484A, F486P, F490S, R493Q, Q498R, N501Y, Y505H showed favorable stability, particularly evident for F486P mutation.

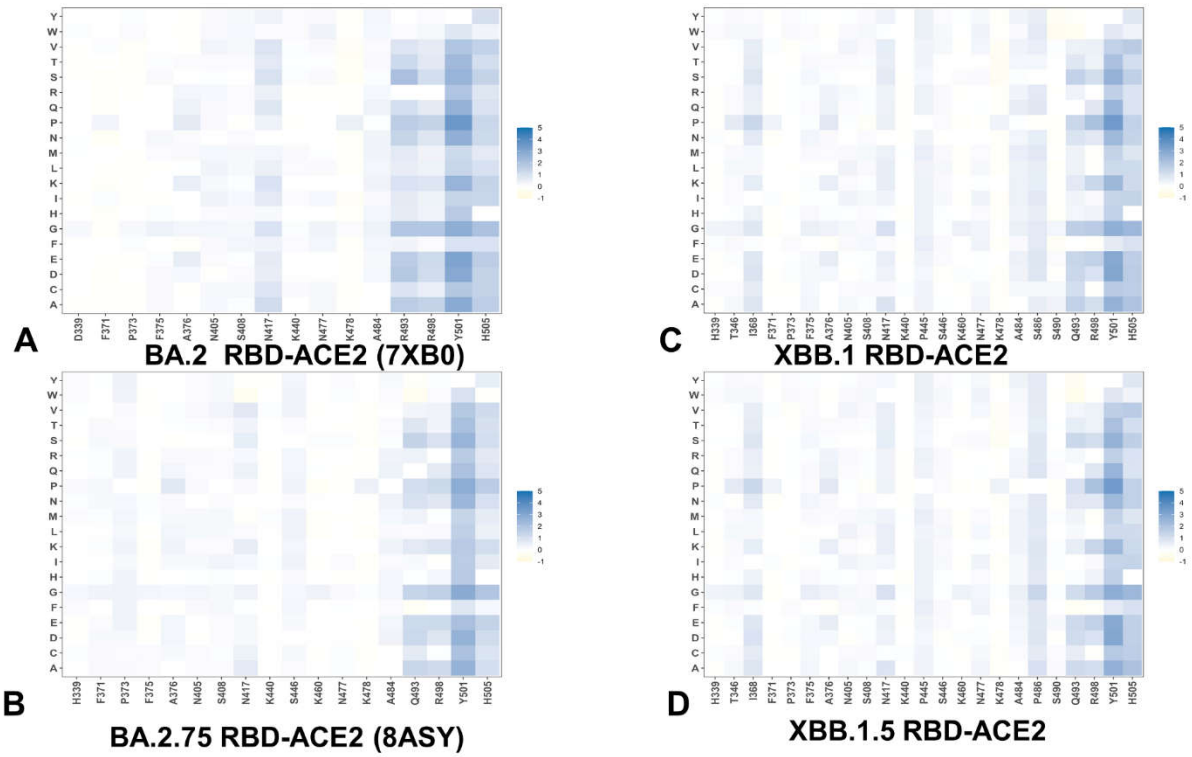

**Figure S4.** Ensemble-based dynamic mutational profiling of the Omicron RBD mutational sites in the RBD-hACE2 complexes. The mutational scanning heatmaps are shown for the BA.2 mutational sites in the Omicron RBD BA.2-hACE2 complex (A). Mutational scanning heatmap for the BA.2.75 mutational sites in the Omicron RBD BA.2.75-hACE2 complex (B). Mutational heatmap for the XBB.1 mutational sites in the Omicron RBD XBB.1-hACE2 complex (C). Mutational heatmap for the XBB.1.5 mutational sites in the Omicron RBD XBB.1.5-hACE2 (D).

**Table S1.** The list of the intermolecular contacts in the structure of SARS-CoV-2 BA.2 RBD-ACE2 complex (pdb id 7XB0).

| ACE2 Residue | ACE2 Residue Number | ACE2 Chain ID | RBD Residue | RBD Residue Number | RBD Chain ID |
|--------------|---------------------|---------------|-------------|--------------------|--------------|
| ASP          | 355                 | A             | GLY         | 502                | B            |
| TYR          | 83                  | A             | ASN         | 487                | B            |
| GLN          | 24                  | A             | ASN         | 477                | B            |
| ASP          | 355                 | A             | THR         | 500                | B            |
| ASP          | 30                  | A             | PHE         | 456                | B            |
| GLN          | 42                  | A             | TYR         | 449                | B            |
| ASP          | 38                  | A             | TYR         | 501                | B            |
| GLY          | 354                 | A             | TYR         | 501                | B            |
| TYR          | 83                  | A             | TYR         | 489                | B            |
| LEU          | 45                  | A             | VAL         | 445                | B            |
| LEU          | 45                  | A             | THR         | 500                | B            |
| LYS          | 353                 | A             | TYR         | 495                | B            |
| GLN          | 24                  | A             | PHE         | 486                | B            |
| HIS          | 34                  | A             | LEU         | 455                | B            |
| LYS          | 353                 | A             | GLY         | 502                | B            |
| LYS          | 353                 | A             | THR         | 500                | B            |
| SER          | 19                  | A             | ALA         | 475                | B            |
| LYS          | 31                  | A             | LEU         | 455                | B            |
| LEU          | 79                  | A             | PHE         | 486                | B            |
| GLN          | 24                  | A             | TYR         | 489                | B            |
| TYR          | 41                  | A             | ARG         | 498                | B            |
| ASN          | 330                 | A             | THR         | 500                | B            |
| THR          | 20                  | A             | ALA         | 475                | B            |

|     |     |   |     |     |   |
|-----|-----|---|-----|-----|---|
| LYS | 353 | A | VAL | 503 | B |
| ARG | 357 | A | THR | 500 | B |
| LYS | 353 | A | HIS | 505 | B |
| TYR | 41  | A | TYR | 501 | B |
| TYR | 83  | A | PHE | 486 | B |
| GLU | 35  | A | ARG | 493 | B |
| ASP | 38  | A | ARG | 498 | B |
| LEU | 79  | A | GLY | 485 | B |
| GLY | 354 | A | GLY | 502 | B |
| GLN | 24  | A | ALA | 475 | B |
| GLY | 354 | A | THR | 500 | B |
| ASP | 38  | A | GLY | 496 | B |
| PHE | 28  | A | TYR | 489 | B |
| ALA | 25  | A | ASN | 487 | B |
| THR | 27  | A | TYR | 489 | B |
| THR | 27  | A | PHE | 456 | B |
| SER | 19  | A | GLY | 476 | B |
| HIS | 34  | A | TYR | 453 | B |
| GLY | 354 | A | VAL | 503 | B |
| ASP | 30  | A | ASN | 417 | B |
| MET | 82  | A | PHE | 486 | B |
| GLU | 37  | A | HIS | 505 | B |
| GLY | 354 | A | HIS | 505 | B |
| LEU | 45  | A | ARG | 498 | B |
| ASP | 38  | A | TYR | 449 | B |
| THR | 27  | A | ALA | 475 | B |

|     |     |   |     |     |   |
|-----|-----|---|-----|-----|---|
| ASP | 355 | A | TYR | 501 | B |
| LYS | 353 | A | ARG | 403 | B |
| HIS | 34  | A | ARG | 493 | B |
| GLN | 325 | A | GLN | 506 | B |
| TYR | 41  | A | THR | 500 | B |
| HIS | 34  | A | ARG | 403 | B |
| GLN | 24  | A | GLY | 476 | B |
| GLY | 352 | A | GLY | 502 | B |
| GLN | 24  | A | ASN | 487 | B |
| GLN | 42  | A | ARG | 498 | B |
| LYS | 31  | A | ARG | 493 | B |
| ASP | 38  | A | TYR | 495 | B |
| SER | 19  | A | ASN | 477 | B |
| LYS | 353 | A | TYR | 501 | B |
| ASP | 30  | A | LEU | 455 | B |
| LYS | 31  | A | TYR | 489 | B |
| LYS | 31  | A | PHE | 456 | B |
| LYS | 31  | A | GLY | 485 | B |
| HIS | 34  | A | ASN | 417 | B |
| THR | 27  | A | TYR | 473 | B |
| THR | 20  | A | ASN | 477 | B |
| GLY | 326 | A | THR | 500 | B |
| GLN | 42  | A | GLY | 446 | B |
| GLY | 352 | A | TYR | 501 | B |
| ASN | 330 | A | PRO | 499 | B |



**Table S2.** The list of the intermolecular contacts in the structure of SARS-CoV-2 BA.2.75 RBD-ACE2 complex (pdb id 8ASY).

| ACE2 Residue | ACE2 Residue Number | ACE2 Chain ID | RBD Residue | RBD Residue Number | RBD Chain ID |
|--------------|---------------------|---------------|-------------|--------------------|--------------|
| ARG          | 357                 | A             | THR         | 500                | B            |
| LYS          | 31                  | A             | PHE         | 456                | B            |
| GLU          | 35                  | A             | GLN         | 493                | B            |
| ASP          | 38                  | A             | TYR         | 449                | B            |
| ASP          | 355                 | A             | GLY         | 502                | B            |
| LYS          | 353                 | A             | GLY         | 496                | B            |
| GLU          | 37                  | A             | HIS         | 505                | B            |
| LEU          | 45                  | A             | THR         | 500                | B            |
| THR          | 27                  | A             | ALA         | 475                | B            |
| ASN          | 330                 | A             | THR         | 500                | B            |
| TYR          | 83                  | A             | TYR         | 489                | B            |
| ASP          | 30                  | A             | PHE         | 456                | B            |
| THR          | 27                  | A             | TYR         | 489                | B            |
| ASP          | 355                 | A             | THR         | 500                | B            |
| LYS          | 353                 | A             | TYR         | 495                | B            |
| HIS          | 34                  | A             | GLN         | 493                | B            |
| PHE          | 28                  | A             | TYR         | 489                | B            |
| PHE          | 28                  | A             | ASN         | 487                | B            |
| ASP          | 38                  | A             | GLY         | 496                | B            |
| SER          | 19                  | A             | ASN         | 477                | B            |
| LYS          | 353                 | A             | HIS         | 505                | B            |
| ASP          | 38                  | A             | TYR         | 495                | B            |

|     |     |   |     |     |   |
|-----|-----|---|-----|-----|---|
| LYS | 353 | A | GLY | 502 | B |
| SER | 19  | A | ALA | 475 | B |
| THR | 27  | A | PHE | 456 | B |
| GLY | 354 | A | TYR | 501 | B |
| GLN | 24  | A | ASN | 477 | B |
| LEU | 79  | A | PHE | 486 | B |
| GLN | 42  | A | ARG | 498 | B |
| TYR | 83  | A | ASN | 487 | B |
| LYS | 353 | A | TYR | 501 | B |
| LYS | 31  | A | LEU | 455 | B |
| GLY | 354 | A | THR | 500 | B |
| LYS | 353 | A | THR | 500 | B |
| TYR | 83  | A | PHE | 486 | B |
| GLN | 24  | A | TYR | 489 | B |
| LEU | 45  | A | VAL | 445 | B |
| ASP | 30  | A | LEU | 455 | B |
| LYS | 353 | A | ARG | 498 | B |
| HIS | 34  | A | ASN | 417 | B |
| ASP | 38  | A | TYR | 501 | B |
| GLY | 354 | A | HIS | 505 | B |
| GLY | 354 | A | GLY | 502 | B |
| GLN | 42  | A | TYR | 449 | B |
| TYR | 41  | A | TYR | 501 | B |
| MET | 82  | A | PHE | 486 | B |
| HIS | 34  | A | TYR | 453 | B |
| GLY | 352 | A | TYR | 501 | B |

|     |     |   |     |     |   |
|-----|-----|---|-----|-----|---|
| ALA | 25  | A | ASN | 487 | B |
| TYR | 41  | A | THR | 500 | B |
| SER | 19  | A | GLY | 476 | B |
| LYS | 31  | A | TYR | 489 | B |
| LYS | 31  | A | GLN | 493 | B |
| GLY | 354 | A | VAL | 503 | B |
| ASP | 355 | A | TYR | 501 | B |
| ASP | 38  | A | ARG | 498 | B |
| TYR | 41  | A | ARG | 498 | B |
| LEU | 45  | A | ARG | 498 | B |
| GLN | 24  | A | ALA | 475 | B |
| GLN | 24  | A | GLY | 476 | B |
| GLN | 42  | A | SER | 446 | B |
| HIS | 34  | A | LEU | 455 | B |
| THR | 27  | A | TYR | 473 | B |
| GLN | 24  | A | ASN | 487 | B |
| LYS | 31  | A | PHE | 490 | B |
| GLN | 325 | A | VAL | 503 | B |
| GLN | 24  | A | PHE | 486 | B |

**Table S3.** The list of the intermolecular contacts in the structure of SARS-CoV-2 XBB.1 RBD-ACE2 complex (structural model).

| ACE2 Residue | ACE2 Residue Number | ACE2 Chain ID | RBD Residue | RBD Residue Number | RBD Chain ID |
|--------------|---------------------|---------------|-------------|--------------------|--------------|
| LEU          | 79                  | A             | GLY         | 485                | B            |
| ALA          | 25                  | A             | ASN         | 487                | B            |
| HIS          | 34                  | A             | ARG         | 403                | B            |
| LEU          | 45                  | A             | THR         | 500                | B            |
| GLN          | 24                  | A             | ALA         | 475                | B            |
| TYR          | 83                  | A             | ASN         | 487                | B            |
| ASN          | 330                 | A             | THR         | 500                | B            |
| ASP          | 30                  | A             | ASN         | 417                | B            |
| ASP          | 38                  | A             | SER         | 494                | B            |
| TYR          | 41                  | A             | ARG         | 498                | B            |
| GLN          | 42                  | A             | ARG         | 498                | B            |
| TYR          | 83                  | A             | TYR         | 489                | B            |
| GLY          | 354                 | A             | GLY         | 502                | B            |
| LYS          | 31                  | A             | SER         | 490                | B            |
| HIS          | 34                  | A             | TYR         | 453                | B            |
| LYS          | 353                 | A             | GLY         | 504                | B            |
| TYR          | 41                  | A             | THR         | 500                | B            |
| THR          | 20                  | A             | ASN         | 477                | B            |
| LEU          | 79                  | A             | SER         | 486                | B            |
| THR          | 27                  | A             | ALA         | 475                | B            |
| LYS          | 353                 | A             | GLY         | 502                | B            |
| ALA          | 36                  | A             | ARG         | 493                | B            |
| MET          | 82                  | A             | ASN         | 487                | B            |

|     |     |   |     |     |   |
|-----|-----|---|-----|-----|---|
| HIS | 34  | A | ASN | 417 | B |
| GLY | 326 | A | THR | 500 | B |
| GLN | 24  | A | TYR | 489 | B |
| ASP | 38  | A | TYR | 495 | B |
| GLY | 354 | A | TYR | 501 | B |
| LYS | 31  | A | TYR | 489 | B |
| GLY | 354 | A | HIS | 505 | B |
| GLN | 24  | A | GLY | 476 | B |
| PHE | 28  | A | TYR | 489 | B |
| ASP | 355 | A | GLY | 502 | B |
| TYR | 83  | A | SER | 486 | B |
| ASP | 38  | A | ARG | 498 | B |
| ASN | 330 | A | PRO | 499 | B |
| GLN | 42  | A | TYR | 449 | B |
| LYS | 353 | A | TYR | 501 | B |
| HIS | 34  | A | SER | 494 | B |
| LEU | 45  | A | PRO | 445 | B |
| LYS | 353 | A | HIS | 505 | B |
| LYS | 31  | A | LEU | 455 | B |
| LYS | 353 | A | VAL | 503 | B |
| GLN | 24  | A | ASN | 477 | B |
| ASP | 38  | A | TYR | 501 | B |
| LEU | 45  | A | ARG | 498 | B |
| ASP | 355 | A | TYR | 501 | B |
| LYS | 31  | A | ALA | 484 | B |
| LEU | 39  | A | ARG | 493 | B |

|     |     |   |     |     |   |
|-----|-----|---|-----|-----|---|
| LYS | 353 | A | TYR | 495 | B |
| HIS | 34  | A | ARG | 493 | B |
| MET | 82  | A | SER | 486 | B |
| LYS | 353 | A | GLN | 506 | B |
| LYS | 31  | A | PHE | 456 | B |
| GLY | 352 | A | TYR | 501 | B |
| ASP | 30  | A | LEU | 455 | B |
| LYS | 31  | A | CYS | 488 | B |
| GLY | 354 | A | THR | 500 | B |
| SER | 19  | A | GLY | 476 | B |
| GLN | 325 | A | GLN | 506 | B |
| PHE | 28  | A | PHE | 456 | B |
| ASP | 38  | A | TYR | 449 | B |
| HIS | 34  | A | GLU | 406 | B |
| ASP | 30  | A | PHE | 456 | B |
| THR | 27  | A | TYR | 473 | B |
| TYR | 41  | A | TYR | 501 | B |
| GLN | 42  | A | SER | 446 | B |
| THR | 27  | A | PHE | 456 | B |
| SER | 19  | A | ASN | 477 | B |
| GLN | 24  | A | ASN | 487 | B |
| ASP | 38  | A | ARG | 493 | B |
| ARG | 357 | A | THR | 500 | B |
| HIS | 34  | A | LEU | 455 | B |
| GLU | 35  | A | ARG | 493 | B |
| GLU | 37  | A | HIS | 505 | B |

|     |     |   |     |     |   |
|-----|-----|---|-----|-----|---|
| THR | 27  | A | TYR | 489 | B |
| ASP | 355 | A | THR | 500 | B |
| SER | 19  | A | ALA | 475 | B |
| ASP | 38  | A | GLY | 496 | B |
| GLY | 354 | A | VAL | 503 | B |

**Table S4.** The list of the intermolecular contacts in the structure of SARS-CoV-2 XBB.1.5 RBD-ACE2 complex (structural model).

| ACE2 Residue | ACE2 Residue Number | ACE2 Chain ID | RBD Residue | RBD Residue Number | RBD Chain ID |
|--------------|---------------------|---------------|-------------|--------------------|--------------|
| GLU          | 37                  | A             | HIS         | 505                | B            |
| GLN          | 42                  | A             | TYR         | 449                | B            |
| LEU          | 45                  | A             | PRO         | 445                | B            |
| TYR          | 41                  | A             | ARG         | 498                | B            |
| SER          | 19                  | A             | ALA         | 475                | B            |
| ASP          | 38                  | A             | TYR         | 501                | B            |
| GLY          | 354                 | A             | GLY         | 502                | B            |
| GLN          | 24                  | A             | ASN         | 477                | B            |
| PHE          | 28                  | A             | TYR         | 489                | B            |
| TYR          | 41                  | A             | THR         | 500                | B            |
| HIS          | 34                  | A             | ARG         | 403                | B            |
| GLY          | 354                 | A             | THR         | 500                | B            |
| LEU          | 39                  | A             | ARG         | 493                | B            |
| GLN          | 24                  | A             | ALA         | 475                | B            |
| GLN          | 325                 | A             | GLN         | 506                | B            |
| TYR          | 83                  | A             | ASN         | 487                | B            |
| ASP          | 30                  | A             | LEU         | 455                | B            |
| GLY          | 326                 | A             | THR         | 500                | B            |
| MET          | 82                  | A             | ASN         | 487                | B            |
| TYR          | 83                  | A             | TYR         | 489                | B            |
| THR          | 20                  | A             | ASN         | 477                | B            |
| LYS          | 31                  | A             | PHE         | 456                | B            |
| LYS          | 353                 | A             | GLY         | 504                | B            |



|     |     |   |     |     |   |
|-----|-----|---|-----|-----|---|
| LYS | 31  | A | ARG | 493 | B |
| ASP | 38  | A | ARG | 493 | B |
| ASP | 38  | A | ARG | 498 | B |
| ASP | 30  | A | PHE | 456 | B |
| HIS | 34  | A | ASN | 417 | B |
| LYS | 31  | A | TYR | 489 | B |
| GLN | 24  | A | ASN | 487 | B |
| SER | 19  | A | GLY | 476 | B |
| ARG | 357 | A | THR | 500 | B |
| ASN | 330 | A | PRO | 499 | B |
| GLN | 24  | A | TYR | 489 | B |
| THR | 27  | A | TYR | 489 | B |
| HIS | 34  | A | LEU | 455 | B |
| HIS | 34  | A | SER | 494 | B |
| SER | 19  | A | ASN | 477 | B |
| ASP | 355 | A | TYR | 501 | B |
| TYR | 83  | A | PRO | 486 | B |
| LYS | 31  | A | LEU | 455 | B |
| LYS | 353 | A | TYR | 501 | B |
| MET | 82  | A | PRO | 486 | B |
| LEU | 79  | A | PRO | 486 | B |
| ASP | 38  | A | SER | 494 | B |
| GLY | 352 | A | TYR | 501 | B |
| THR | 27  | A | ALA | 475 | B |
| LYS | 353 | A | HIS | 505 | B |
| HIS | 34  | A | TYR | 453 | B |

|     |     |   |     |     |   |
|-----|-----|---|-----|-----|---|
| ASN | 330 | A | THR | 500 | B |
| LYS | 353 | A | VAL | 503 | B |
| ASP | 38  | A | TYR | 449 | B |
| ASP | 30  | A | ASN | 417 | B |
| LEU | 45  | A | ARG | 498 | B |
| HIS | 34  | A | ARG | 493 | B |
| GLN | 42  | A | ARG | 498 | B |
| LEU | 45  | A | THR | 500 | B |
| LYS | 353 | A | TYR | 495 | B |
| THR | 27  | A | TYR | 473 | B |
| TYR | 41  | A | TYR | 501 | B |
| LYS | 353 | A | GLN | 506 | B |
| THR | 27  | A | PHE | 456 | B |
| ASP | 355 | A | GLY | 502 | B |
| ALA | 36  | A | ARG | 493 | B |
| GLN | 42  | A | SER | 446 | B |
| ASP | 38  | A | TYR | 495 | B |
| LYS | 353 | A | GLY | 502 | B |
| GLY | 354 | A | TYR | 501 | B |
| GLU | 35  | A | ARG | 493 | B |
| HIS | 34  | A | GLU | 406 | B |
| ASP | 355 | A | THR | 500 | B |
| GLY | 354 | A | HIS | 505 | B |
| ASP | 38  | A | GLY | 496 | B |
| GLY | 354 | A | VAL | 503 | B |
| LEU | 79  | A | GLY | 485 | B |

|     |    |   |     |     |   |
|-----|----|---|-----|-----|---|
| GLN | 24 | A | GLY | 476 | B |
|-----|----|---|-----|-----|---|
